# Supplementary material for: Efficient CRISPR-rAAV engineering of endogenous genes to study protein function by allele-specific RNAi
Source: PubMed Central journal article supplement (PMC4402508; doi:10.1093/nar/gku1403), 2015-01-13

## **Supplemental Figures**

### **Efficient CRISPR-rAAV Engineering of Endogenous Genes to Study Protein Function by Allele-Specific RNAi**

Manuel Kaulich<sup>1</sup>, Yeon J. Lee<sup>1</sup>, Peter Lönn<sup>1</sup>, Aaron D. Springer<sup>1</sup>, Bryan R. Meade<sup>1</sup> and Steven F. Dowdy<sup>1,\*</sup>

<sup>1</sup>Department of Cellular and Molecular Medicine, University of California, San Diego, 9500 Gilman Drive, La Jolla, CA 92093, USA.

\* To whom correspondence should be addressed.

Steven F. Dowdy  
Tel: (858) 534-7772  
Fax: (858) 534-7797  
Email: [sdowdy@ucsd.edu](mailto:sdowdy@ucsd.edu)

**Figure S1. Design and validation of Cdk2 siWT and siSN siRNAs.** (A) Immunoblot showing efficiency of siWT in depleting Cdk2 over time vs. control siCtrl. (B) Sequencing of siSN and siWT Cdk2 genomic sequences. Note 7 silent point mutations (highlighted in red) design of siSN. (C) Immunofluorescence and (D) immunoblot analysis of HEK293T cells, treated as indicated, demonstrating the specificity of siWT and siSN in depleting GFP-Cdk2-WT or GFP-Cdk2-SN, respectively. Note: endogenous Cdk2 protein level is not affected by transfection of siSN (d, lower panel).

**Figure S2. Identification of recombined Cdk2-SN and Cdk2-SN-T160A clones.** (A) Genomic region of Cdk2 highlighting positions of primers used for PCR-based identification of recombined Cdk2-SN-SA-IRES-Neo<sup>R</sup> clones. Primer pair P1 and P2 identify faithful recombined clones, whereas pair P3 and P4 distinguish between single and double allele recombination events. (B) Genomic PCR analysis using primer pair P1/P2 on clones obtained with control Cdk2-SN AAV infection alone, (C) nonspecific CRISPR-gRNA plus Cdk2-SN AAV and (D) CRISPR-gCdk2 plus Cdk2-SN AAV. (E) Genomic PCR analysis using primer pair P3/P4 for detection of double allele recombination of control Cdk2-SN AAV alone, (F) nonspecific CRISPR-gRNA plus Cdk2-SN AAV and (G) CRISPR-gCdk2 plus Cdk2-SN AAV. Orange asterisks indicate double allele recombinations. (H) Genomic PCR analysis using primer pair P1/P2 on clones obtained with nonspecific CRISPR-gRNA plus Cdk2-SN-T160A AAV. (I) Genomic PCR analysis using primer pair P3/P4 for detection of double allele recombination of control Cdk2-SN-T160A AAV alone (clone #7) and nonspecific CRISPR-gRNA plus Cdk2-SN AAV (clone #12) and (J) CRISPR-gCdk2 plus Cdk2-SN-T160A AAV.

**Figure S3. Cdk2 heterozygosity does not affect the human cell cycle.** (A) Cdk2 protein level in Cdk2<sup>+/+</sup> and Cdk2<sup>+/SN-Neo<sup>R</sup></sup> cells prior to neomycin selection cassette removal by Cre-expression. Numbers indicate Cdk2 band intensity normalized to the Tubulin signal. Note: Cdk2<sup>+/SN-Neo<sup>R</sup></sup> cells contain 50% less Cdk2 than Cdk2<sup>+/+</sup> cells. (B) Time-lapse video microscopy of Cdk2<sup>+/+</sup> and Cdk2<sup>+/SN-Neo<sup>R</sup></sup> cells after serum re-stimulation, following cell-cycle re-entry. (C) Size-exclusion chromatography of lysates from asynchronously growing parental Cdk2<sup>+/+</sup> and AAV-targeted Cdk2<sup>+/SN-Neo<sup>R</sup></sup> REP1 cells. Note: 50% of Cdk2 protein level is sufficient to complex all cyclin A and E.

**Figure S4. Cdk2 protein levels after transfection with siWT, siSN or a combination of both.** Bar graph representing quantification of Cdk2 protein levels from Fig. 2e based on three independent experiments. Colour code matches Figure 2f.

**Figure S5. Identification of recombined Cdk1-SN-T160E clones.** (A) Genomic region of Cdk1 highlighting positions of primers used for PCR-based identification of faithfully recombined Cdk1-SN-T161E-SA-IRES-Neo<sup>R</sup> clones. Primer pair P1 and P2 identify faithful recombined clones, whereas pair P3 and P4 distinguish between single and double allele recombination events. (B) Genomic PCR analysis on clones obtained with CRISPR-gCdk1 plus Cdk1-T161E-

SN rAAV with 40/40 (100%) faithful recombination events Genomic PCR analysis using primer pair P1/P2 on clones obtained with Cdk1-T161E-SN AAV plus CRISPR-gCdk1. Bottom band = wild type allele, top band = T161E-siSN recombined allele.

**A**

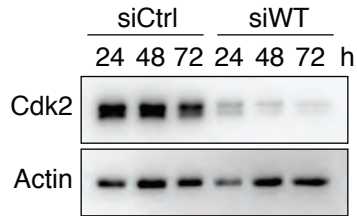

**B**

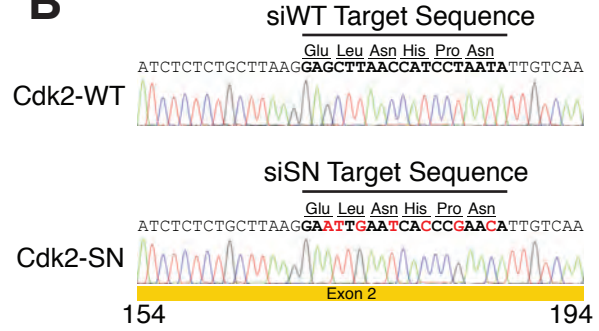

**C**

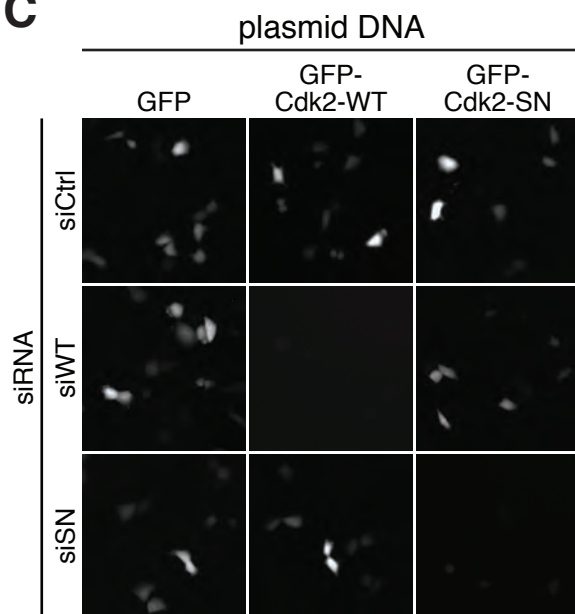

**D**

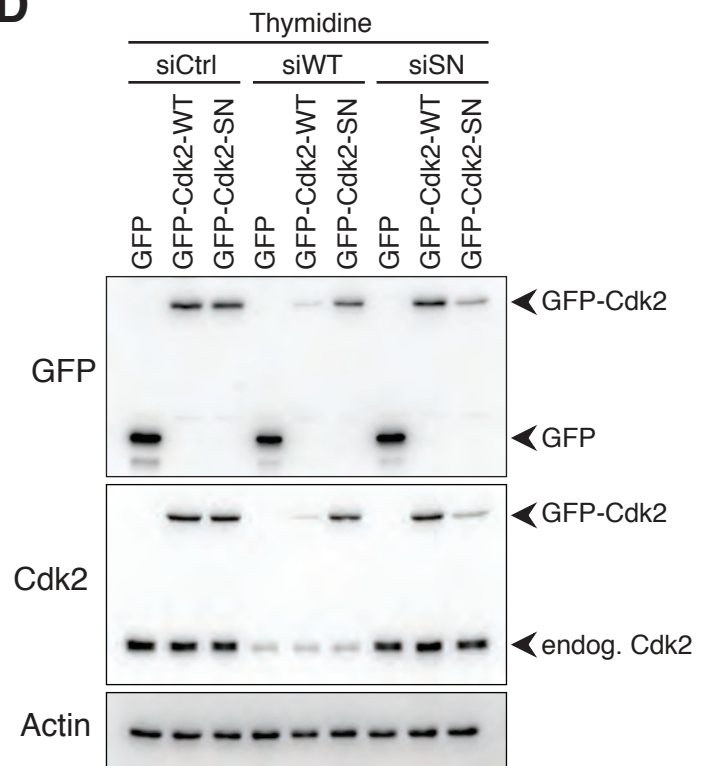

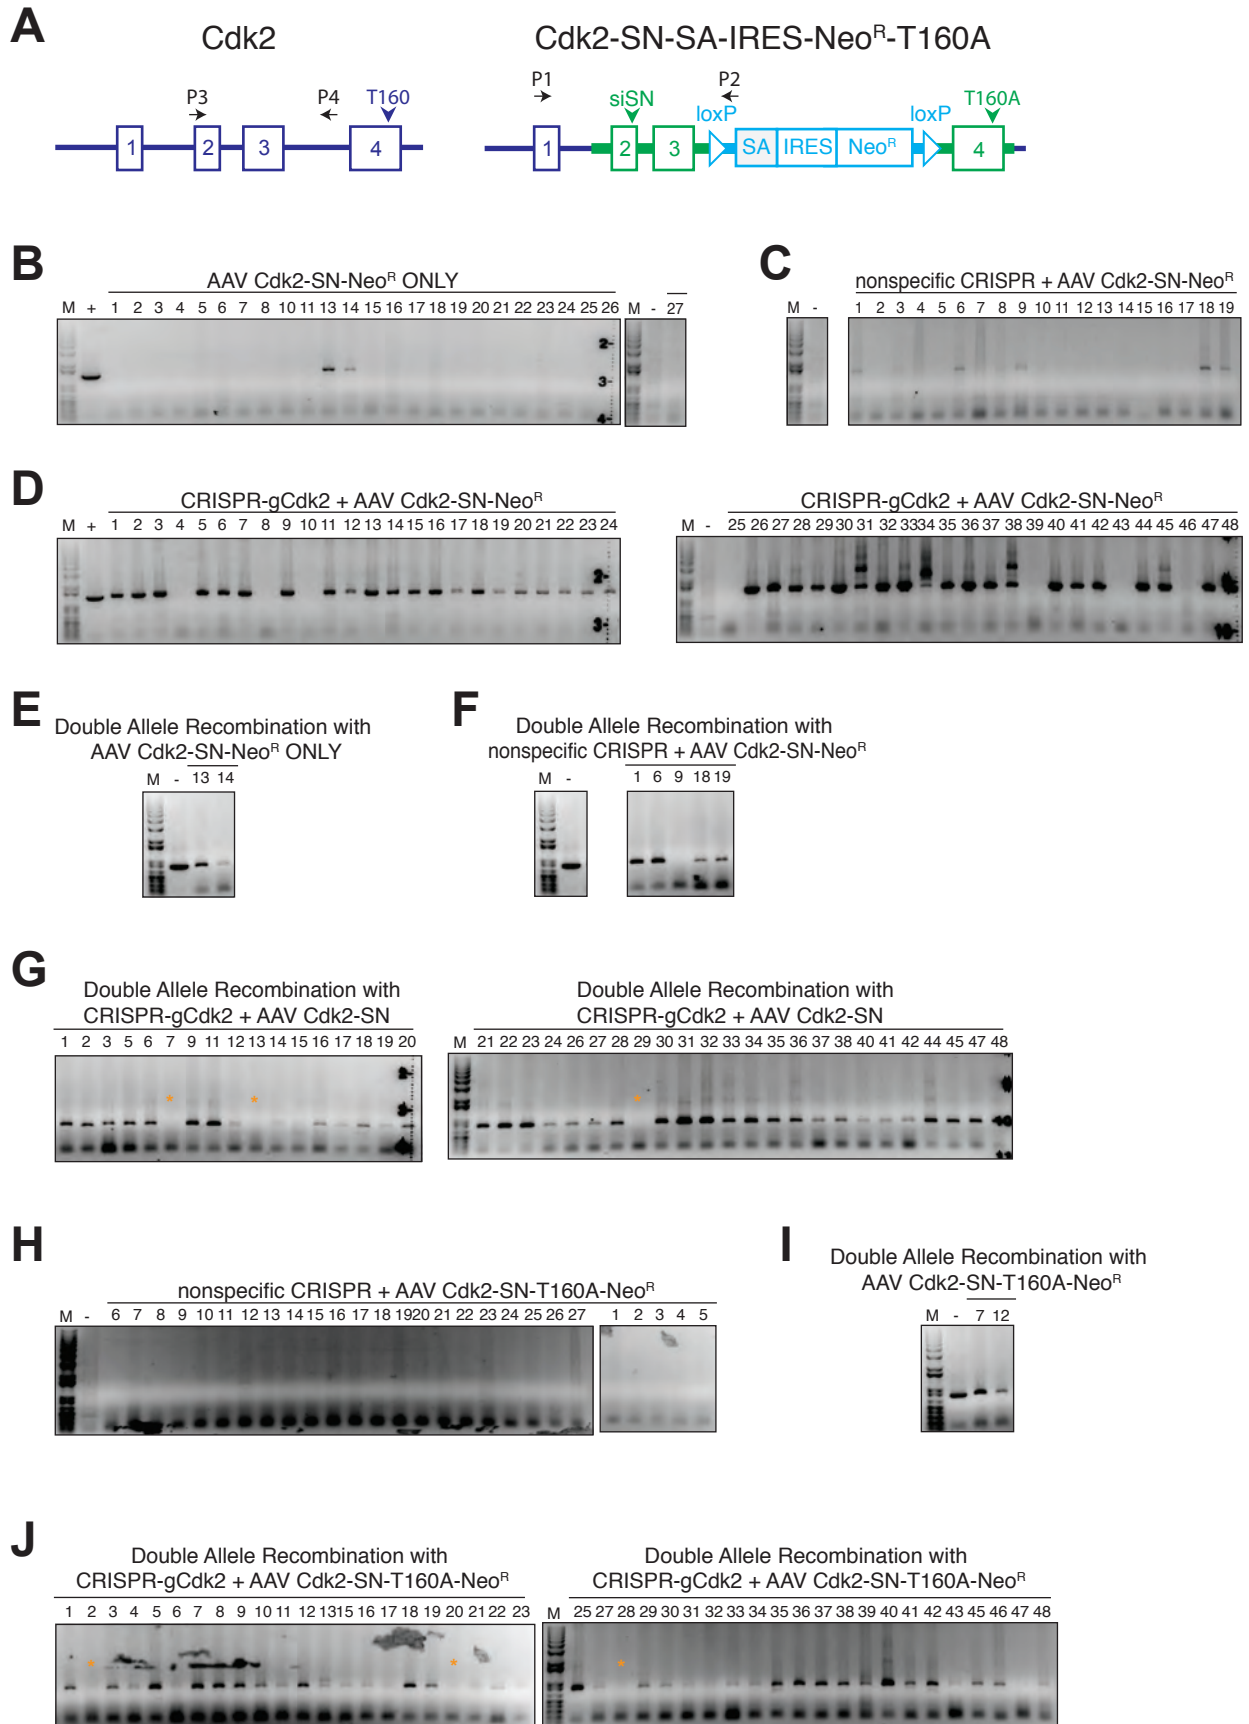

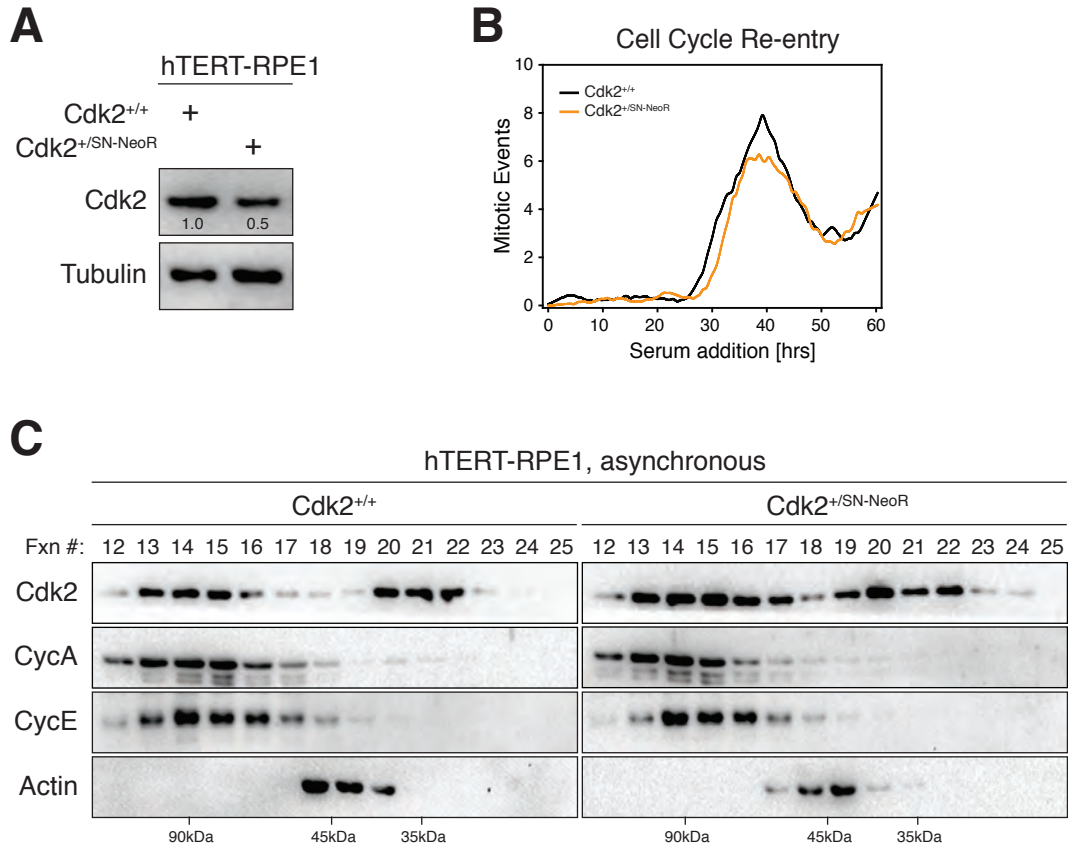

# Kaulich et al., Supplementary Figure 4

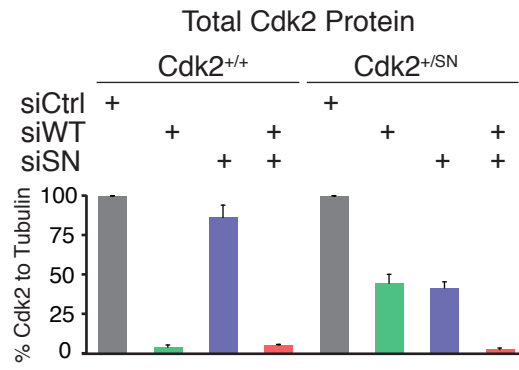

**A**

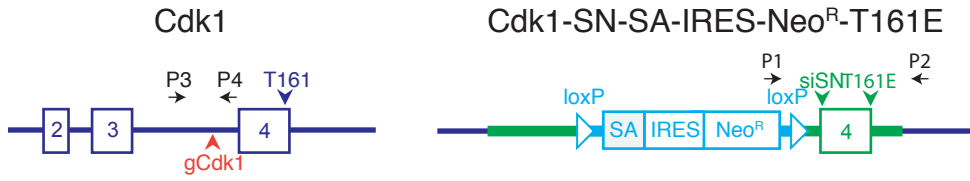

**B**

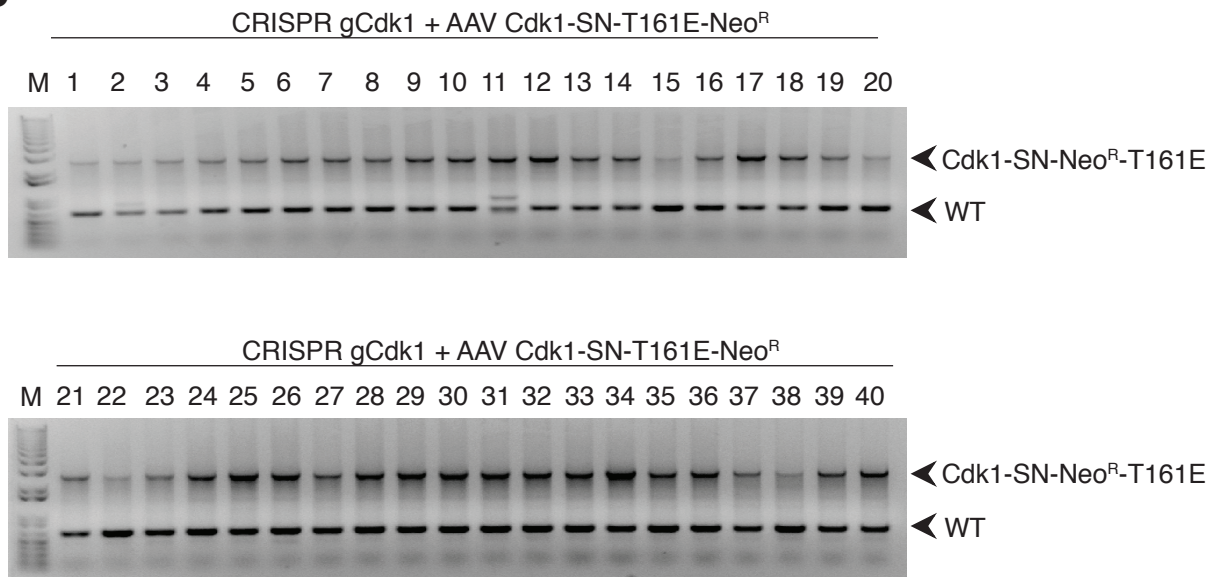

Supplement: supp_gku1403_nar-03187-met-k-2014-File003.pdf [file supp_gku1403_nar-03187-met-k-2014-File003.pdf]
